# Supplementary material for: Structural and electrochemical characterization of metallo-porphyrins intercalated into ZnCr-layered double hydroxides: some evidence of dimer formation
Source: Royal Society of Chemistry journal article supplement (doi:10.1039/c1nj20400a), 2011-01-01
Supplement: c1nj20400a.pdf [file c1nj20400a.pdf]

## Electronic supplementary information

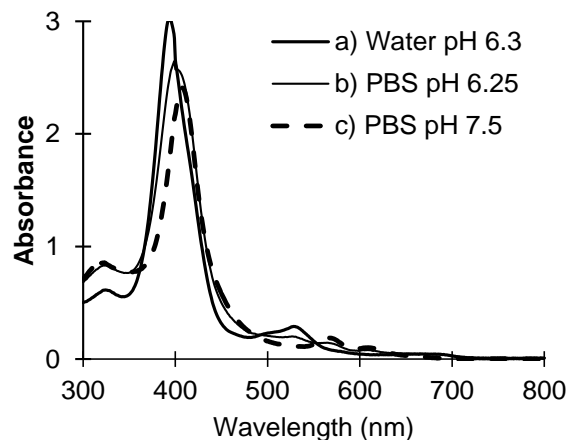

**Fig.ESI1:** UV-Vis spectra of 60  $\mu\text{M}$  FeTSPP in water pH 6.3 (a), in PBS pH 6.25 (b), pH 7.5 (c).

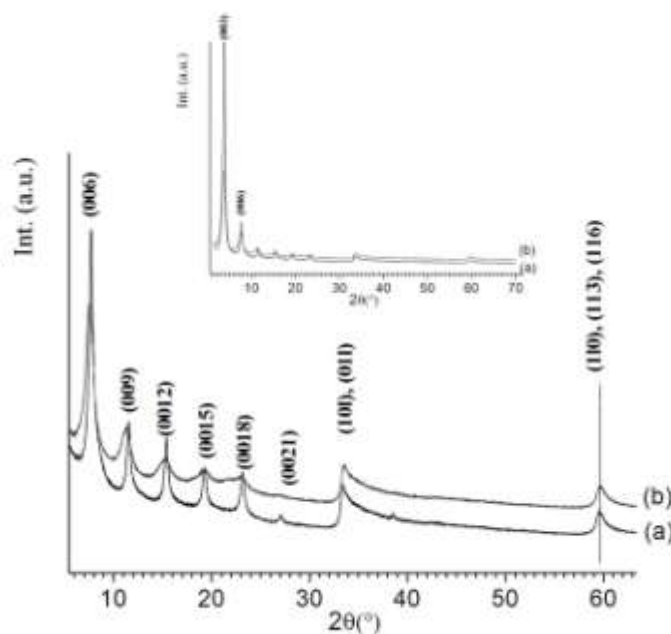

**Fig.ESI2:** X-ray powder diffraction patterns in the  $2\theta$  range 5-65° (inset 1-30°) of (a)  $\text{Zn}_2\text{Cr-ZnTSPP}$  and (b)  $\text{Zn}_2\text{Cr-FeTSPP}$ . Labels give the Bragg reflections in the space group  $R\bar{3}m$ .

FTIR spectra (Fig.ESI3) show besides the vibration bands of the ZnCr LDH framework at 3500-3400  $\text{cm}^{-1}$  ( $\nu_{\text{OH}}$ ) and at 576 and 507  $\text{cm}^{-1}$  corresponding to the  $\nu_{\text{MO}}$  lattice vibrations, the characteristic bands due to the TSPP porphyrins. IR spectra of TSPP porphyrins are characterized

by four main regions recorded between 2000 and 400  $\text{cm}^{-1}$ . Vibration bands in the region 1600-1350  $\text{cm}^{-1}$  are due to stretching vibrations of C=C and C=N in phenyl and pyridyl aromatic ring. Bands situated between 1200 and 1010  $\text{cm}^{-1}$  are typical of phenyl-sulfonate groups and those between 1000 and 900  $\text{cm}^{-1}$  of  $\nu\text{C-H}$  rock and  $\delta\text{N-H}$  pyrrole groups. Finally, the 700-800  $\text{cm}^{-1}$  region is attributed to out of plane C-H vibrations<sup>1</sup>. The fundamental stretching vibrations  $\nu_{\text{as}}(\text{SO}_3)$  and  $\nu_{\text{s}}(\text{SO}_3)$  are observed at 1176 and 1037  $\text{cm}^{-1}$  for  $\text{Zn}_2\text{Cr-ZnTSP}$  and at 1180 and 1038  $\text{cm}^{-1}$  for  $\text{Zn}_2\text{Cr-FeTSP}$ . The position of these two bands are practically the same than that observed reported for the corresponding ZnAl-porphyrin hybrids, with bands at 1171 and 1036  $\text{cm}^{-1}$  for ZnAl-ZnTSP<sup>2</sup> and 1184 and 1039  $\text{cm}^{-1}$  for ZnAl-FeTSP<sup>3</sup>. These peak positions are similar to the free porphyrins, suggesting that  $\text{SO}_3^-$  groups of intercalated porphyrins interact with the LDH layers via weak noncovalent interactions.

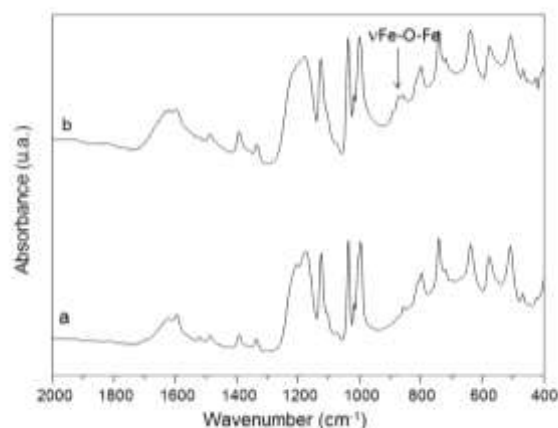

**Fig.ESI3:** FTIR spectra of  $\text{Zn}_2\text{Cr-ZnTSP}$  (a) and  $\text{Zn}_2\text{Cr-FeTSP}$  (b).

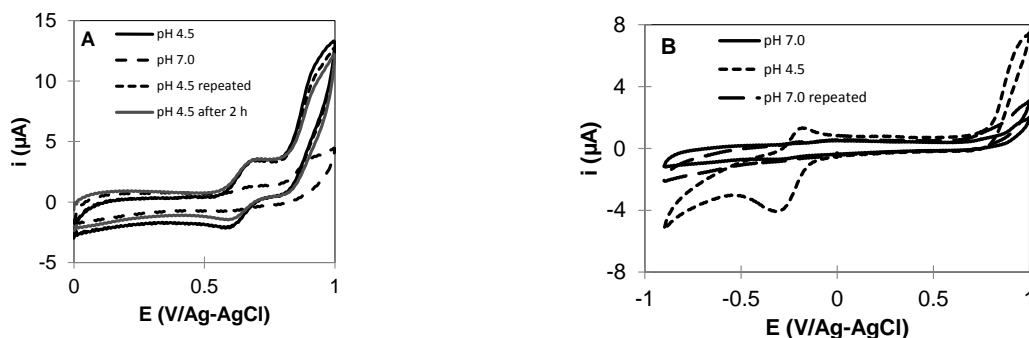

**Fig.ESI4:** Cyclic voltammograms recorded in different PBS using the same  $\text{Zn}_2\text{Cr-ZnTSP/GCE}$  (20<sup>th</sup> cycles) (A) and  $\text{Zn}_2\text{Cr-FeTSP/GCE}$  (10<sup>th</sup> cycles) (B) (0.1 M PBS under argon,  $\nu = 50 \text{ mV s}^{-1}$ ).

## References

1. K. Nakamoto, ed., *Infrared and Raman spectra of Inorganic and coordination compounds* Wiley, New York, 1997.
2. E. Káfuňková, C. Taviot-Gueho, P. Bezdika, M. Klementov, P. Kov, P. Kubt, J. Mosinger, M. Pospil and K. Lang, *Chem. Mater.*, 2010, **22**, 2481-2480.
3. M. Halma, A. K. Dias de Freitas Castro, C. Taviot-Gueho, V. Prevot, C. Forano, F. Wypych and S. Nakagaki, *J. Catal.*, 2008, **257**, 233-243.
